# Supplementary material
Source: PubMed Central journal article supplement (PMC3271929)
Supplement: 1116706108_pnas.1116706108_SI.pdf [file 1116706108_pnas.1116706108_SI.pdf]

# Supporting Information

Swann et al. 10.1073/pnas.1116706108

Table S1. Climate field values, 30 °N to 60 °N

| Month       | Variable Name   | Units        | Land   |          |          |                      | Ocean  |          |          |                      |
|-------------|-----------------|--------------|--------|----------|----------|----------------------|--------|----------|----------|----------------------|
|             |                 |              | $\mu$  | $\Delta$ | $\sigma$ | $p$                  | $\mu$  | $\Delta$ | $\sigma$ | $p$                  |
| Annual Mean | Surf. Air Temp. | K            | 280.81 | 1.04     | 0.10     | <b>0.003</b>         | 285.97 | 0.79     | 0.12     | <b>0.023</b>         |
|             | Precipitation   | mm/day       | 1.73   | 0.06     | 0.04     | $p < \mathbf{0.001}$ | 2.83   | 0.03     | 0.04     | $p < \mathbf{0.001}$ |
|             | Albedo          | albedo       | 0.22   | -0.05    | 0.00     | $p < \mathbf{0.001}$ | 0.07   | 0.00     | 0.00     | $p < \mathbf{0.001}$ |
|             | Latent Heat     | $Wm^{-2}$    | 33.42  | 1.04     | 0.74     | $p < \mathbf{0.001}$ | 80.28  | 2.17     | 0.87     | $p < \mathbf{0.001}$ |
|             | Sensible Heat   | $Wm^{-2}$    | 26.50  | 8.24     | 0.40     | $p < \mathbf{0.001}$ | 21.29  | -0.60    | 0.43     | $p < \mathbf{0.001}$ |
|             | Low Cloud       | fraction     | 0.29   | -0.03    | 0.00     | $p < \mathbf{0.001}$ | 0.54   | -0.01    | 0.00     | $p < \mathbf{0.001}$ |
|             | Water Vapor     | $kgm^{-2}$   | 13.14  | 1.04     | 0.10     | $p < \mathbf{0.001}$ | 20.75  | 1.25     | 0.17     | $p < \mathbf{0.001}$ |
|             | Transpiration   | $Wm^{-2}$    | 9.80   | 3.33     | 0.02     | $p < \mathbf{0.001}$ | -      | -        | -        | -                    |
|             | Leaf Area Index | $m^2 m^{-2}$ | 1.50   | 0.10     | 0.00     | $p < \mathbf{0.001}$ | -      | -        | -        | -                    |
|             | 1-ET/PET        | unitless     | -0.36  | 0.02     | 0.05     | 0.111                | -      | -        | -        | -                    |
| JJA         | Surf. Air Temp. | K            | 293.48 | 1.89     | 0.13     | $p < \mathbf{0.001}$ | 289.98 | 1.08     | 0.15     | $p < \mathbf{0.001}$ |
|             | Precipitation   | mm/day       | 2.25   | -0.08    | 0.09     | $p < \mathbf{0.001}$ | 1.65   | -0.02    | 0.11     | 0.436                |
|             | Albedo          | albedo       | 0.18   | -0.04    | 0.00     | $p < \mathbf{0.001}$ | 0.05   | 0.00     | 0.00     | 0.168                |
|             | Latent Heat     | $Wm^{-2}$    | 63.58  | 0.66     | 2.02     | 0.084                | 42.19  | 2.44     | 1.84     | $p < \mathbf{0.001}$ |
|             | Sensible Heat   | $Wm^{-2}$    | 49.36  | 15.70    | 1.16     | $p < \mathbf{0.001}$ | 4.82   | 0.08     | 1.11     | 0.723                |
|             | Low Cloud       | fraction     | 0.17   | -0.03    | 0.01     | $p < \mathbf{0.001}$ | 0.61   | 0.00     | 0.01     | 0.826                |
|             | Water Vapor     | $kgm^{-2}$   | 20.72  | 1.93     | 0.16     | $p < \mathbf{0.001}$ | 28.95  | 1.58     | 0.24     | $p < \mathbf{0.001}$ |
|             | Transpiration   | $Wm^{-2}$    | 24.28  | 6.19     | 0.01     | $p < \mathbf{0.001}$ | -      | -        | -        | -                    |
|             | Leaf Area Index | $m^2 m^{-2}$ | 1.79   | 0.02     | 0.00     | $p < \mathbf{0.001}$ | -      | -        | -        | -                    |
|             | 1-ET/PET        | unitless     | 0.50   | 0.01     | 0.17     | 0.168                | -      | -        | -        | -                    |
| DJF         | Surf. Air Temp. | K            | 268.22 | -0.03    | 0.11     | 0.983                | 282.03 | 0.03     | 0.11     | 0.985                |
|             | Precipitation   | mm/day       | 1.41   | 0.32     | 0.06     | $p < \mathbf{0.001}$ | 4.07   | 0.18     | 0.07     | $p < \mathbf{0.001}$ |
|             | Albedo          | albedo       | 0.28   | -0.07    | 0.00     | $p < \mathbf{0.001}$ | 0.11   | 0.00     | 0.00     | <b>0.005</b>         |
|             | Latent Heat     | $Wm^{-2}$    | 10.25  | 1.83     | 1.36     | $p < \mathbf{0.001}$ | 114.44 | 3.38     | 1.55     | $p < \mathbf{0.001}$ |
|             | Sensible Heat   | $Wm^{-2}$    | 3.87   | 1.19     | 0.43     | $p < \mathbf{0.001}$ | 43.33  | -1.33    | 0.59     | $p < \mathbf{0.001}$ |
|             | Low Cloud       | fraction     | 0.43   | -0.02    | 0.01     | $p < \mathbf{0.001}$ | 0.55   | -0.01    | 0.01     | $p < \mathbf{0.001}$ |
|             | Water Vapor     | $kgm^{-2}$   | 7.36   | 0.35     | 0.19     | <b>0.007</b>         | 14.71  | 0.87     | 0.27     | $p < \mathbf{0.001}$ |
|             | Transpiration   | $Wm^{-2}$    | 0.78   | 0.64     | 0.04     | $p < \mathbf{0.001}$ | -      | -        | -        | -                    |
|             | Leaf Area Index | $m^2 m^{-2}$ | 1.19   | 0.12     | 0.00     | $p < \mathbf{0.001}$ | -      | -        | -        | -                    |
|             | 1-ET/PET        | unitless     | 0.51   | -0.01    | 0.02     | 0.321                | -      | -        | -        | -                    |

Variables of interest are shown from climate model runs averaged over the entire year (annual mean), summer months (June, July, and August—JJA), and winter months (December, January, and February—DJF). Values are reported as the mean ( $\mu$ ) of the control run (CON), the anomaly ( $\Delta$ , TREE-CON), the standard deviation of the control ( $\sigma$ ) and  $p$ -value of significance for spatial averages over either land or ocean area north of 30 °N and south of 60 °N.  $p$ -values of 0.05 or less indicate significance of at least 95% confidence and are shown in bold. Hyphens indicate land surface quantities that are not defined over the ocean.
